# Supplementary material
Source: Springer Nature journal article supplement (https://www.springermedizin.de/resource/supplementary/12985_2009_625_MOESM1_ESM.pdf/9608140)

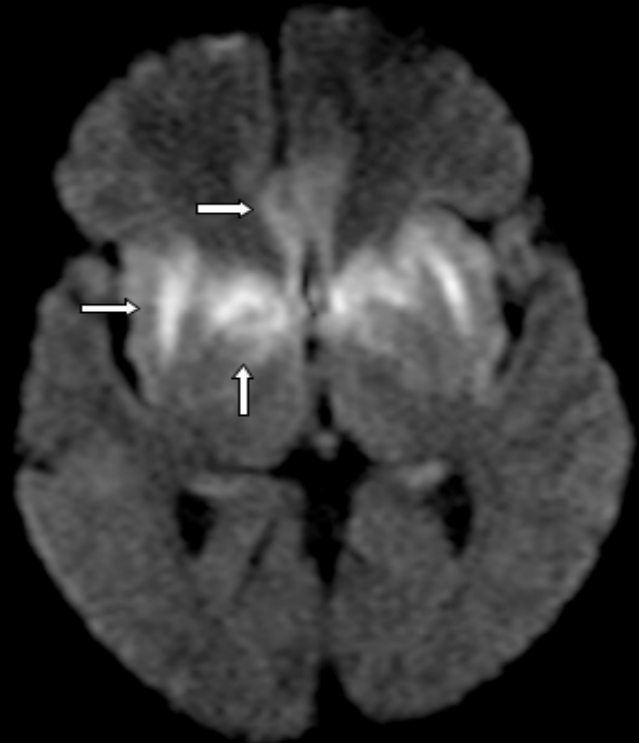

A

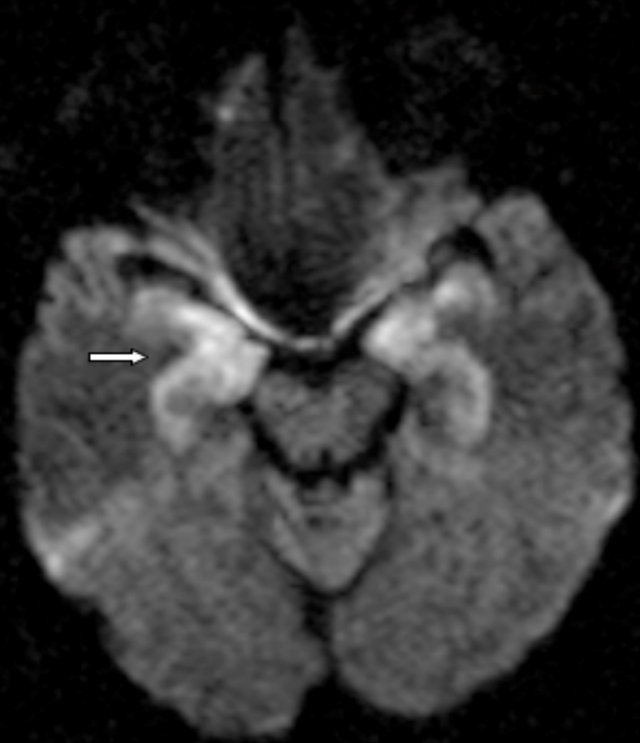

B

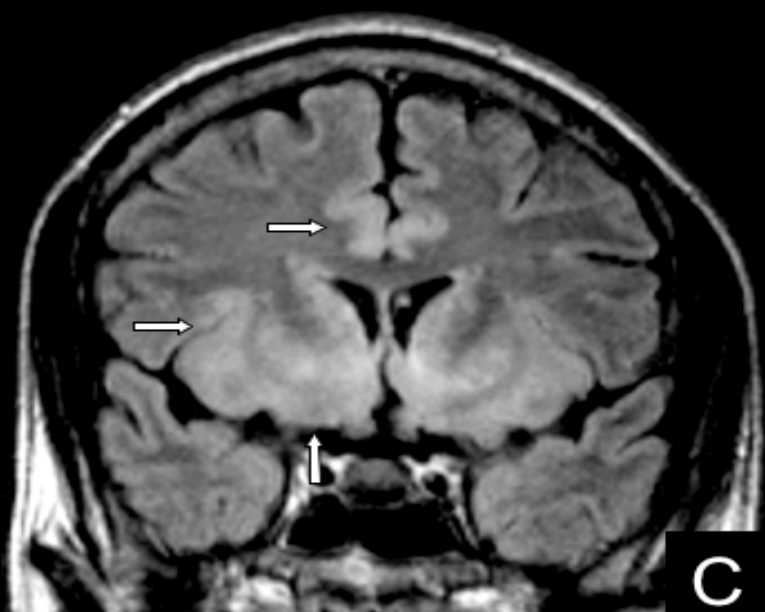

C

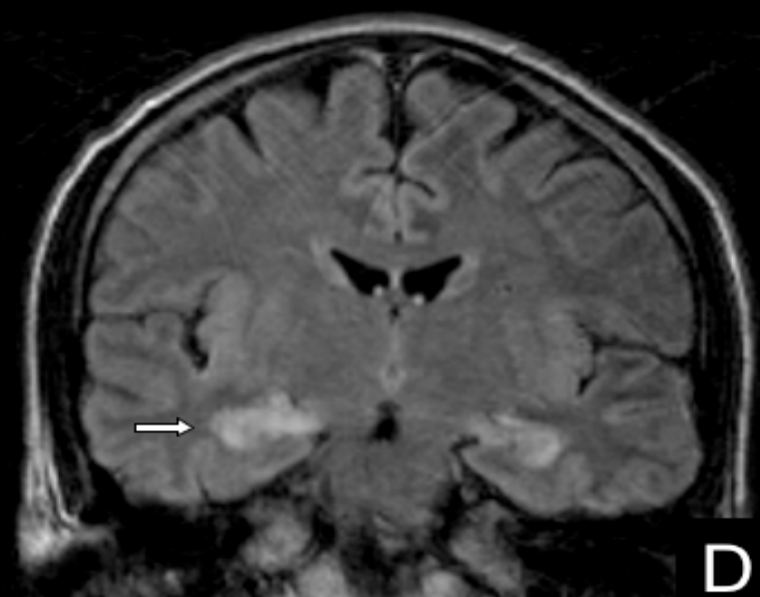

D

Supplement: MOESM1 [file 9608140]
